# Supplementary material for: Factors associated with SARS-CoV-2 positivity in 20 homeless shelters in Toronto, Canada, from April to July 2020: a repeated cross-sectional study
Source: PubMed Central journal article supplement — CMAJ Open. 2021 Mar 30;9(1):E302–8. doi: 10.9778/cmajo.20200253 (PMC8096394; doi:10.9778/cmajo.20200253), 2021-03-30
Supplement: supp_9.1.E302_2020-0253-2-at.pdf [file supp_9.1.E302_2020-0253-2-at.pdf]

## Description of shelters included in mobile outreach testing

| Testing date                | Shelter    | Population         | Number of people eligible for testing (by date) | Proportion of those eligible who were tested (by date) | Number of positive cases | Age of residents tested, Mean (SD) | Sex of residents tested, N (%) female | Residents with provincial health insurance card, N (%) |
|-----------------------------|------------|--------------------|-------------------------------------------------|--------------------------------------------------------|--------------------------|------------------------------------|---------------------------------------|--------------------------------------------------------|
| <b>Outbreak testing</b>     |            |                    |                                                 |                                                        |                          |                                    |                                       |                                                        |
| April 23                    | Shelter A  | Men                | 61                                              | 44 (72.1%)                                             | 8 (18.2%)                | 51.4 (16.2)                        | 0 (0.00%)                             | 35 (79.6%)                                             |
| April 30                    | Shelter B  | Mixed adults       | 45                                              | 18 (40.0%)                                             | 0 (0.0%)                 | 43.9 (13.5)                        | 0 (0.00%)                             | 9 (50.0%)                                              |
| May 6                       | Shelter A  | Men                | 87                                              | 75 (86.2%)                                             | 3 (4.0%)                 | 57.7(10.7)                         | 0 (0.00%)                             | 71 (94.7%)                                             |
| May 8                       | Shelter A  | Men                | 57                                              | 34 (59.6%)                                             | 2 (5.9%)                 | 45.2(12.3)                         | 0 (0.00%)                             | 29 (85.3%)                                             |
| May 11                      | Shelter C  | Men^               | 64                                              | 58 (90.6%)                                             | 1 (1.7%)                 | 51.0(14.2)                         | <10%                                  | 51 (87.9%)                                             |
| May 20                      | Shelter D  | Mixed adults       | 17                                              | 16 (94.1%)                                             | 0 (0.0%)                 | 56.0(9.8)                          | 0 (0.00%)                             | 14 (87.5%)                                             |
| May 21                      | Shelter E  | Men                | 45                                              | 40 (88.9%)                                             | 13 (32.5%)               | 45.5(11.3)                         | 0 (0.00%)                             | 17 (42.5%)                                             |
| May 26                      | Shelter A  | Men                | 87                                              | 75 (86.2%)                                             | 7 (9.3%)                 | 57.8(11.9)                         | 0 (0.00%)                             | 73 (97.3%)                                             |
| May 28                      | Shelter F  | Men                | 104                                             | 51 (49.0%)                                             | 11 (21.6%)               | 54.1 (13.8)                        | 0 (0.00%)                             | 29 (56.9%)                                             |
| June 1                      | Shelter F  | Men                | 103                                             | 93 (90.3%)                                             | 24 (25.8%)               | 48.9(11.4)                         | 0 (0.00%)                             | 60 (64.5%)                                             |
| <b>Surveillance testing</b> |            |                    |                                                 |                                                        |                          |                                    |                                       |                                                        |
| June 9                      | Shelter G  | Women              | 46                                              | 36 (78.3%)                                             | 0 (0.0%)                 | 42.2(11.8)                         | 35 (97.2%)                            | 21 (58.3%)                                             |
| June 11                     | Shelter H  | Women and Children | 96                                              | 66 (68.8%)                                             | 11 (16.7%)               | 18.1(15.2)                         | 41 (62.1%)                            | 32 (48.5%)                                             |
| June 15                     | Shelter A  | Men                | 81                                              | 56 (69.1%)                                             | 0 (0.0%)                 | 43.6(12.1)                         | 0 (0.0%)                              | 52 (89.7%)                                             |
| June 22                     | Shelter I  | Mixed adults       | 45                                              | 26 (57.8%)                                             | 0 (0.0%)                 | 46.7(10.37)                        | <10%                                  | 11 (42.3%)                                             |
| June 24                     | Shelter B  | Mixed adults       | 78                                              | 54 (69.2%)                                             | 0 (0.0%)                 | 43.34(12.5)                        | <10%                                  | 31 (57.4%)                                             |
| June 29                     | *Shelter J | Men                | 47                                              | 35 (74.4%)                                             | 0 (0.0%)                 | 43.9(13.2)                         | 0 (0.00%)                             | 24 (68.6%)                                             |
| July 2                      | Shelter C  | Men                | 64                                              | 55 (85.9%)                                             | 0 (0.0%)                 | 48.2(14.1)                         | 0 (0.00%)                             | 48 (88.9%)                                             |
| July 6                      | Shelter K  | Youth              | 100                                             | 21 (21.0%)                                             | 0 (0.0%)                 | 22.1(3.3)                          | <25%                                  | 9 (42.9%)                                              |
| July 7                      | Shelter L  | Women              | 24                                              | 12 (50.0%)                                             | 0 (0.0%)                 | 52.5 (13.4)                        | 10 (83.3%)                            | 11 (91.7%)                                             |

Appendix 2, as supplied by the authors. Appendix to: Kiran T, Craig-Neil A, Das P, et al. Factors associated with SARS-CoV-2 positivity in 20 homeless shelters in Toronto, Canada from April to July 2020: a repeated cross-sectional study. *CMAJ Open* 2021. DOI:10.9778/cmajo.20200253. Copyright © 2021 The Author(s) or their employer(s). To receive this resource in an accessible format, please contact us at [cmajgroup@cmaj.ca](mailto:cmajgroup@cmaj.ca).

|         |            |                    |     |            |          |             |             |             |
|---------|------------|--------------------|-----|------------|----------|-------------|-------------|-------------|
| July 7  | Shelter M  | Women              | 25  | 16 (64.0%) | 0 (0.0%) | 65.5(9.6)   | 16 (100.0%) | 15 (93.78%) |
| July 8  | Shelter N  | Women              | 40  | 15 (37.5%) | 0 (0.0%) | 48.9 (16.7) | 15 (100.0%) | <20%        |
| July 8  | Shelter O  | Mixed Adults       | 40  | 18 (45.0%) | 0 (0.0%) | 50.3(14.6)  | 0 (0.0%)    | 9 (50.0%)   |
| July 14 | Shelter P  | Mixed Adults       | 40  | 14 (35.0%) | 0 (0.0%) | 50.1(11.5)  | <25%        | 10 (71.4%)  |
| July 15 | Shelter Q  | Female             | 33  | 10 (30.3%) | 0 (0.0%) | 41.5(11.5)  | 10 (100.0%) | <50%        |
| July 21 | *Shelter R | Mixed Adults       | 197 | 30 (15.2%) | 0 (0.0%) | 52.6(12.9)  | 9 (30.0%)   | 16 (53.3%)  |
| July 22 | Shelter S  | Youth              | 9   | 6 (66.7%)  | 0 (0.0%) | 23.6(1.8)   | 0 (0.0%)    | <80%        |
| July 23 | *Shelter T | Young Mixed Adults | 65  | 25 (38.5%) | 0 (0.0%) | 37.7 (9.4)  | 8 (32.0%)   | 20 (80.0%)  |

Notes:

\*designates a leased hotel site housing shelter residents

^the main shelter is for men but testing was also done for associated programs that included women  
 For large shelters, the number of people eligible for testing may include only those living in a certain floor or part of the building

Cell sizes less than 6 have been suppressed
