# Supplementary material for: Factors associated with SARS-CoV-2 positivity in 20 homeless shelters in Toronto, Canada, from April to July 2020: a repeated cross-sectional study
Source: PubMed Central journal article supplement — CMAJ Open. 2021 Mar 30;9(1):E302–8. doi: 10.9778/cmajo.20200253 (PMC8096394; doi:10.9778/cmajo.20200253), 2021-03-30
Supplement: supp_9.1.E302_2020-0253-3-at.pdf [file supp_9.1.E302_2020-0253-3-at.pdf]

### Shelter Positivity Rate vs. Weekly Positivity Rate in Toronto

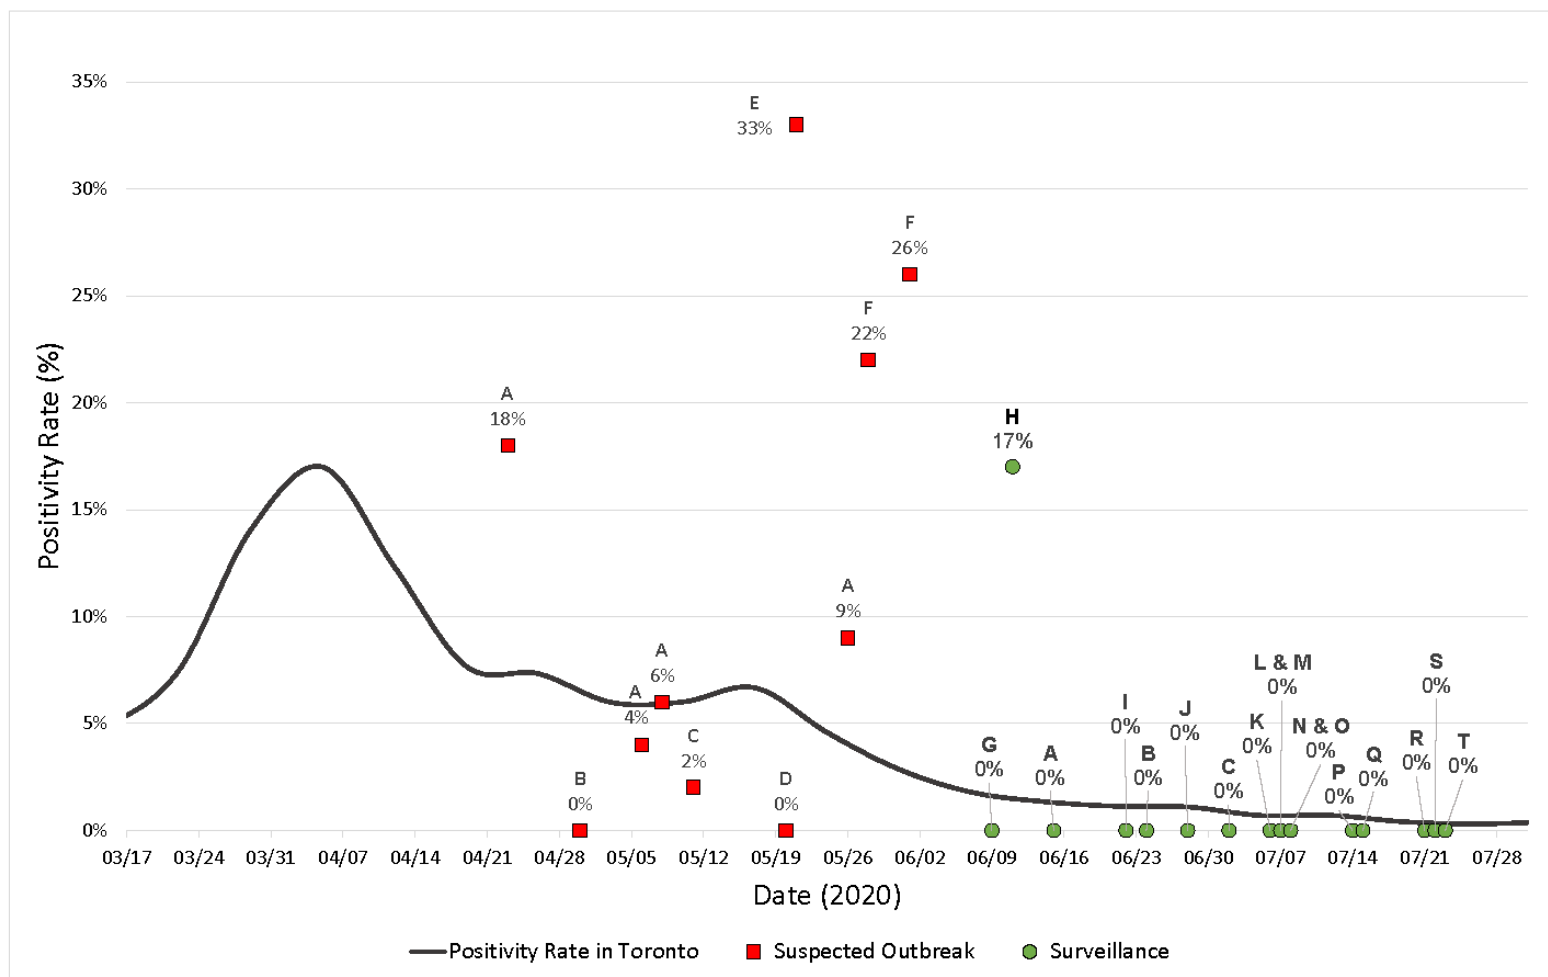

Appendix 3, as supplied by the authors. Appendix to: Kiran T, Craig-Neil A, Das P, et al. Factors associated with SARS-CoV-2 positivity in 20 homeless shelters in Toronto, Canada from April to July 2020: a repeated cross-sectional study. *CMAJ Open* 2021. DOI:10.9778/cmajo.20200253. Copyright © 2021 The Author(s) or their employer(s). To receive this resource in an accessible format, please contact us at [cmajgroup@cmaj.ca](mailto:cmajgroup@cmaj.ca).
